# Supplementary material for: 4-Pyridone-3-carboxamide-1-β-D-ribonucleoside (4PYR)—A Novel Oncometabolite Modulating Cancer-Endothelial Interactions in Breast Cancer Metastasis
Source: MDPI journal article supplement (doi:10.3390/ijms23105774), 2022-05-21
Supplement: s1 [file s1]

## Supplementary Data

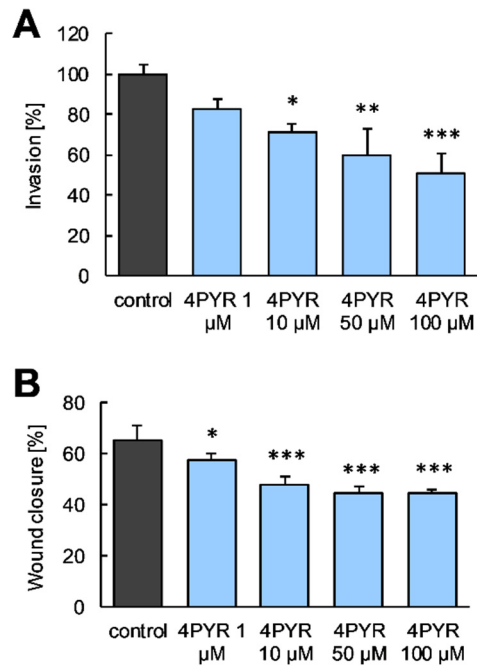

**Figure S1. 4PYR-induced the decrease in invasion and migration of 4T1 breast cancer cell line *in vitro* is dose-dependent.** (A) 4PYR inhibited Matrigel invasion of 4T1 cells at a concentration range from 10 to 100  $\mu$ M, while it had no effect at 1  $\mu$ M. After overnight serum starvation, cells were seeded in a transwell invasion chamber and treated with serial dilutions of 4PYR, as indicated on a graph, for 24 hours. The percentage of cells that invaded across the filter was counted by Mayer's Hematoxylin staining after fixation. The graph represents the mean  $\pm$  SEM of four independent experiments. \* $p < 0.05$ , \*\* $p < 0.01$ , \*\*\* $p < 0.001$  vs. control (non-treated cells). (B) 4PYR inhibits collective migration of 4T1 cells at a concentration range from 1 to 100  $\mu$ M. Cells were seeded in a 96-well plate, and after overnight serum-starvation, a linear wound was applied. The percentage of wound closure was calculated by subtracting the width of the wound after 24 hours from its initial width at time 0 (demonstrated as bars on representative images). The graph represents the mean  $\pm$  SEM of four independent experiments. \* $p < 0.05$ , \*\*\* $p < 0.001$  vs. control (non-treated cells).

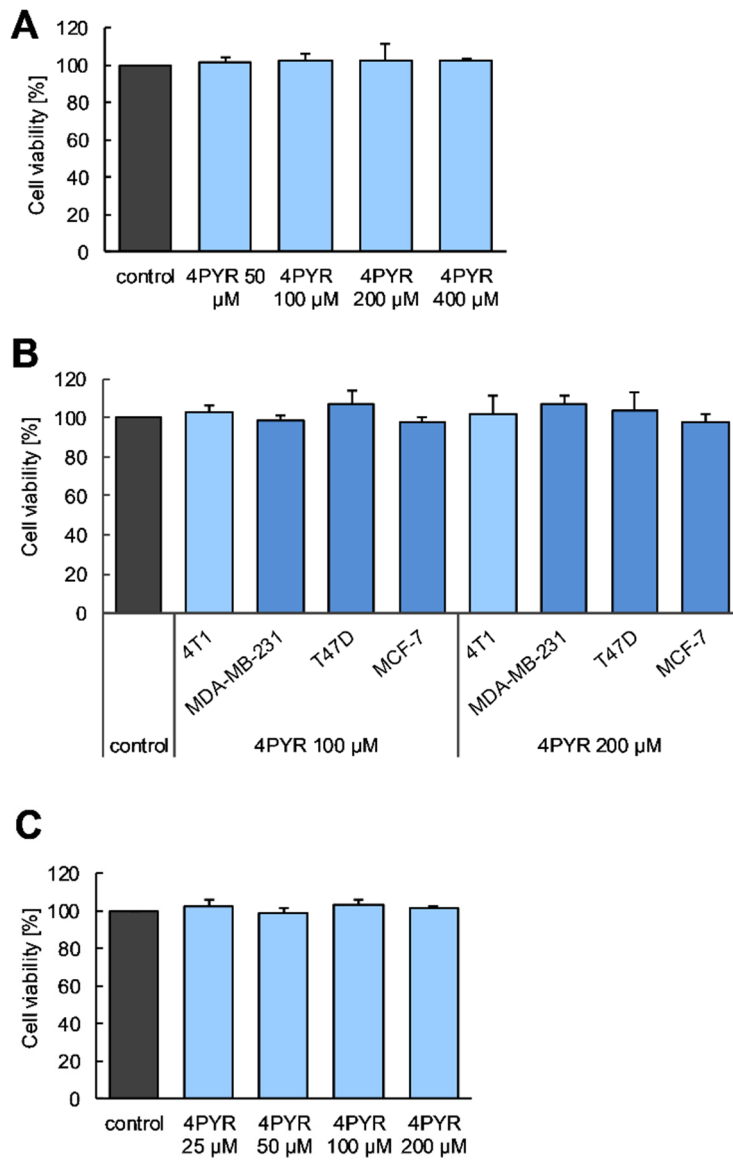

**Figure S2. 4PYR does not affect the viability of analyzed cells, both murine and human tumor cell lines, and an endothelial cell line.** (A) 4PYR did not affect the viability of 4T1 murine breast cancer cell line at the concentration range of 50-400  $\mu$ M, (B) 4PYR did not affect the viability of human breast cancer cell lines (MDA-MB-231, T47D, and MCF-7) at a concentration of 100 and 200  $\mu$ M, comparable to 4T1 cell line, (C) 4PYR did not affect the viability of H5V murine endothelial cell line at the concentration range of 25-200  $\mu$ M. Viability was analyzed with a Neutral Red uptake assay *in vitro*. Mean  $\pm$  SEM, n=3.
